# Supplementary material
Source: MDPI journal article supplement (https://www.mdpi.com/2227-7390/9/6/626)
Supplement: s1 [file s1]

## Sheet: Sheet1
Parameter Estimates
Predictor		Predicted
		Hidden Layer 1																				Output Layer
		H(1:1)	H(1:2)	H(1:3)	H(1:4)	H(1:5)	H(1:6)	H(1:7)	H(1:8)	H(1:9)	H(1:10)	H(1:11)	H(1:12)	H(1:13)	H(1:14)	H(1:15)	H(1:16)	H(1:17)	H(1:18)	H(1:19)	H(1:20)	[PSS=1]	[PSS=2]	[PSS=3]
Input Layer	(Bias)	-0.0469183	0.287576	-0.492171	0.43323	0.624507	-0.368384	0.172013	0.0803883	0.436105	-0.711387	-0.396943	0.333167	0.243999	0.598306	-0.429901	0.445905	0.00443259	0.185049	0.648242	-0.299477
	[D1=0]	-0.0767562	0.0829204	0.0202841	0.120339	-0.0227695	-0.244096	0.117311	0.395662	-0.744704	0.0815434	-0.70998	-0.45965	-0.252929	0.272993	-0.357789	-0.296047	-0.263836	-0.20115	0.309746	0.207521
	[D1=1]	0.038256	1.01021	0.240387	0.342722	-0.318091	-0.101541	0.263908	-0.329212	0.377631	-0.773574	0.449037	0.580569	-0.331097	-0.402247	-0.270928	-0.255784	0.644862	-0.155314	0.24857	0.422191
	[D2=0]	-0.205301	0.477236	0.152992	-0.193507	0.327853	-0.29718	0.0967012	-0.121023	0.604054	-0.312376	-0.149415	-0.0322198	-0.449229	0.143364	-0.488222	0.250607	0.217698	-0.0701976	0.56167	-0.369605
	[D2=1]	0.507886	0.374166	0.13724	0.41598	0.421165	0.306275	-0.283579	0.72067	-0.464629	0.388669	-0.545865	0.571657	0.733514	0.431681	0.467265	-0.589977	-0.550972	0.0450979	0.211958	-0.342239
	[D3=0]	-0.284288	0.192894	-0.0527244	-0.469371	0.0571562	-0.324542	-0.283221	0.450547	0.265792	0.212665	0.485657	0.11561	0.145431	-0.514676	-0.0581352	-0.153924	0.734199	-0.493622	-0.328328	0.649141
	[D3=1]	-0.600359	0.068474	-0.529211	-0.054839	-0.00805576	0.222429	0.3365	-0.0358288	-0.323031	-0.102746	-0.154784	0.252483	-0.384673	0.23915	-0.448658	-0.0863802	-0.793358	0.599623	-0.211295	-0.899501
	[D4=0]	-0.391144	0.0996656	-0.191341	0.565674	-0.0393481	0.186098	0.16472	0.193485	-0.567051	0.19804	-0.683096	-0.225421	0.142231	0.739152	-0.298915	-0.0798386	-0.0289796	-0.490712	0.492978	0.263854
	[D4=1]	0.0908792	0.657971	0.366075	-0.228888	0.0726905	-0.302983	0.332972	-0.430868	0.750814	-0.433112	-0.330275	-0.275015	0.529447	-0.338131	0.358492	-0.274224	0.601575	0.511152	-0.0303237	0.38616
	[D5=0]	-0.105889	0.728929	0.208287	0.335375	-0.321079	-0.298034	0.322033	0.408248	-0.243459	0.00418035	-0.193253	0.267516	0.0612452	0.358729	0.315466	-0.357911	-0.172291	0.142539	-0.131805	-0.428648
	[D5=1]	-0.681424	-0.0825103	-0.67182	0.453856	0.438335	-0.172067	-0.507936	0.297139	-0.0765072	0.0713017	-0.888246	0.295955	-0.117974	-0.382769	-0.165216	0.626024	-0.788724	0.823867	0.526544	0.072053
	[D6=0]	0.418399	0.0902683	-0.386954	0.425485	0.388648	-0.121133	-0.114967	-0.418063	-0.5197	0.369126	0.132692	0.362542	0.277299	0.389997	-0.424647	0.17119	-0.32942	-0.144291	0.118595	0.0666526
	[D6=1]	-0.0173875	0.291781	0.0976587	-0.496529	-0.385852	0.604161	0.0683541	0.536207	0.59523	-0.899217	0.0888605	-0.042576	-0.254173	0.389348	-0.102866	-0.448927	-0.143266	0.264655	0.197018	-0.0856449
	ATM	-0.284223	-0.367992	-0.55362	0.0839171	-0.739923	-0.505826	-0.263098	-0.344314	0.264299	-0.405933	-0.0798513	-0.0278852	0.619258	0.384191	-0.173855	-0.35742	-0.515992	0.582528	-0.00156657	-0.301342
	ENG	-0.183436	-0.791037	-0.587028	0.0445593	0.472293	-0.114172	-0.0628279	0.0412273	0.0129284	0.0901537	-0.119841	-0.69032	0.4228	-0.0149659	-0.207998	0.829805	-0.577884	0.227255	-0.0753598	-0.110349
	ADJ	-0.0338343	-0.383604	0.206115	0.403992	0.0053284	-0.719447	0.247344	0.0895484	0.357123	-0.148731	-0.176586	-0.0896809	-0.200989	-0.189706	-0.205451	0.776947	0.018203	0.805345	-0.149668	-0.4347
	CTE	0.478638	0.0826751	0.174504	-0.262905	0.207607	-0.660361	0.172453	-0.745336	0.300092	0.214859	-0.0374934	-0.266949	0.175371	-0.0625051	0.0712605	-0.500265	0.436397	-0.243332	-0.203758	0.344432
	CPE	-0.107817	-0.664869	0.114272	-0.202128	-0.0679876	0.151253	-0.0229443	0.559298	-0.740712	0.662029	-0.62641	-0.410827	0.544843	1.61734	-0.338314	-0.510185	0.304627	-0.0656482	-0.0284106	-0.148182
	CIN	-0.626638	0.163936	-0.78223	-0.42705	-0.630608	0.238624	-0.0686401	-0.334141	-0.484832	0.853584	-0.277273	-0.511111	0.257324	-0.224987	0.0440232	0.580537	-0.496477	-0.345137	-0.0304619	-0.577082
	PSY	1.13099	0.175893	0.0361456	-0.00980579	0.815338	-0.0438062	-0.361518	0.204483	-0.0888501	-0.115156	-0.320361	-0.695414	-0.50513	0.0237289	0.0504682	0.075497	-0.540642	-0.33156	-0.346083	0.601828
	SLE	-0.653634	0.0223712	-0.259451	-0.0980977	0.453692	-0.0953138	-0.529145	0.576595	0.282479	-0.0131054	-0.0684941	0.346788	0.197256	-0.462617	0.00969294	0.113187	-0.257182	0.473148	-0.186526	-0.683277
Hidden Layer 1	(Bias)																					-0.303392	0.655818	-0.84136
	H(1:1)																					-1.34802	0.438444	0.731026
	H(1:2)																					-0.782661	0.749297	-0.4383
	H(1:3)																					-0.952905	0.313571	0.771791
	H(1:4)																					0.488661	-0.329457	-0.257844
	H(1:5)																					0.919489	-0.775249	-0.165232
	H(1:6)																					0.0982911	-0.375688	-0.312973
	H(1:7)																					-0.137393	0.0247317	0.0923494
	H(1:8)																					-0.0595271	0.82539	-1.15614
	H(1:9)																					-1.17371	-0.0407347	1.24522
	H(1:10)																					1.03326	-0.897778	0.128974
	H(1:11)																					-0.6391	-0.739408	0.901483
	H(1:12)																					-1.1574	0.171819	-0.333001
	H(1:13)																					-0.172429	0.82087	0.182928
	H(1:14)																					-0.174985	1.72511	-0.910718
	H(1:15)																					-0.267622	-0.174384	0.488276
	H(1:16)																					0.860457	-0.741431	-0.0890529
	H(1:17)																					-0.938525	0.404882	0.92693
	H(1:18)																					-0.197646	1.28276	-0.00679993
	H(1:19)																					-0.144838	-0.132317	-0.499909
	H(1:20)																					-0.893697	0.261524	0.575493
	Note: Dependent variable: PSS: 1=low stress, 2=moderate stress, 3=high perceived stress.
